# Supplementary material for: Histidine Residues Are Responsible for Bidirectional Effects of Zinc on Acid-Sensing Ion Channel 1a/3 Heteromeric Channels
Source: MDPI journal article supplement (doi:10.3390/biom10091264), 2020-09-02
Supplement: s1 [file s1]

**Supplementary Figure 1.** Residues H72/H73 in rat ASIC1a, rat ASIC3 and H83 in rat ASIC3 are mapped onto the crystal structure of chicken ASIC1a. The three subunits in the heterotrimer are colored to represent one rASIC1a (grey) subunit and two rASIC3 subunits (cyan and yellow) in the ASIC1a/ASIC3 heterotrimeric channel. Based on the sequence alignment shown in Supplementary Figure 3, in the image shown here, P72 in 2QTS is mutated to H; T84 in subunit 1 is mutated to S; T84 in subunits 2 and 3 are mutated to H. The images are generated using PyMOL. r represents rat in the Figure.

**Supplementary Figure 2.** Potential  $\text{Zn}^{2+}$  binding sites on heterotrimeric ASIC1a/3 channel mapped onto a crystal structure of the ASIC1a channel. The three subunits in the heterotrimer are colored to represent one rASIC1a (grey) subunit and two rASIC3 subunits (cyan and yellow) in the ASIC1a/3 heterotrimeric channel. Only sites at one inter-subunit interface are shown. r represents rat; c represent chicken in the Figure. The images are generated using PyMOL.

**Supplementary Figure 3.** Sequence alignment of rat ASIC1a, rat ASIC3 and the sequence of chicken ASIC1a, which is used to determine the crystal structure of ASIC1a channel. The alignment is performed using the server PROMAL3D.

## Supplementary Figure 1

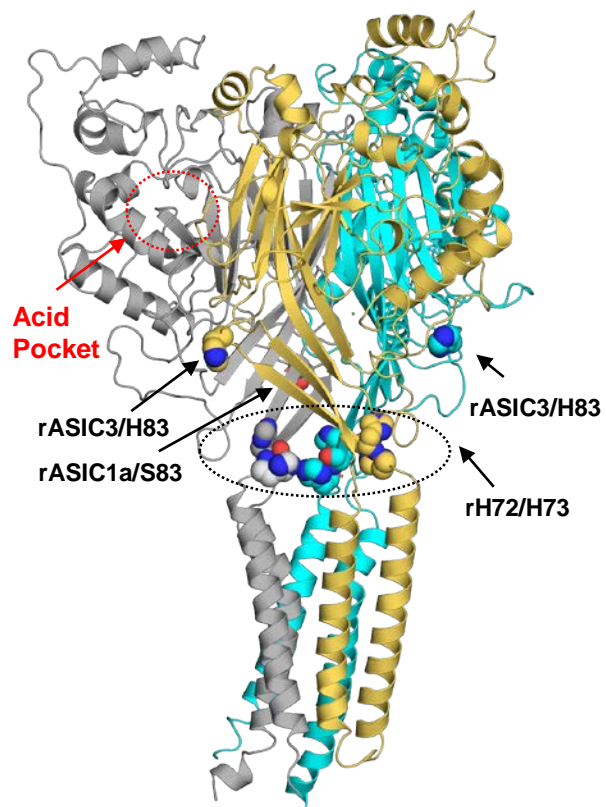

## Supplementary Figure 2

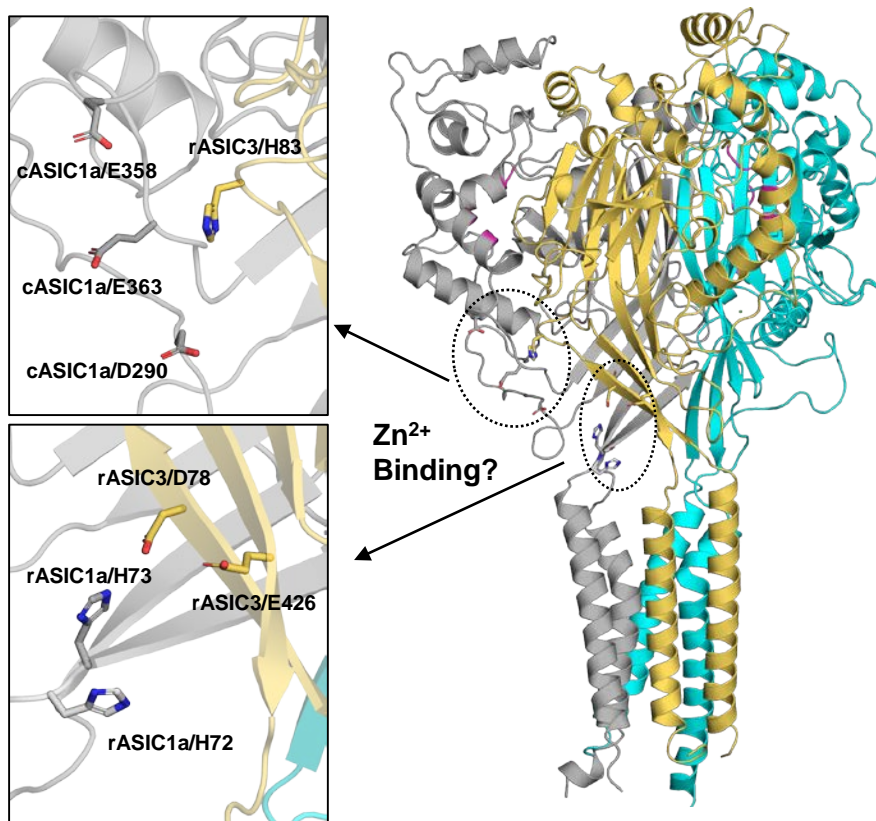

# Colored PROMALS3D alignment (sequences in input order)

|               |   |                                                 |    |   |   |      |   |    |     |   |
|---------------|---|-------------------------------------------------|----|---|---|------|---|----|-----|---|
| Conservation: |   | 9                                               | 99 | 9 | 9 | 9999 | 9 | 99 | 999 | 9 |
| ratASIC1a     | 1 | -MELKTEEEEVGGVQPVSIQAFASSSTLHGLAHIFSYERL        | 39 |   |   |      |   |    |     |   |
| ratASIC3      | 1 | -MKPRSGLEEAQRRQASDIRVFASSCTMHGLGHIFGPGGL        | 39 |   |   |      |   |    |     |   |
| chickenASIC1a | 1 | MMDLKVDDEEEVDSGQPVSIAQAFASSSTLHGLSHIFSYERL      | 40 |   |   |      |   |    |     |   |
| Consensus aa: |   | .Mc.+s.bEEh...QsssIp <h>FASStThHGltHIFT...L</h> |    |   |   |      |   |    |     |   |
| Consensus ss: |   | hhh hhhhhhhhh ehhe                              |    |   |   |      |   |    |     |   |

|               |    |                                                 |    |    |     |   |    |   |   |     |
|---------------|----|-------------------------------------------------|----|----|-----|---|----|---|---|-----|
| Conservation: |    | 9                                               | 9  | 99 | 999 | 9 | 99 | 9 | 9 | 999 |
| ratASIC1a     | 40 | SLKRALWALCFLGSLAVLLCVCTERVQYYFCYHHVTKLDE        | 79 |    |     |   |    |   |   |     |
| ratASIC3      | 40 | TLRRGLWATAVLLSLAAFLYQVAERVRYGFEFH <h>KTTLDE</h> | 79 |    |     |   |    |   |   |     |
| chickenASIC1a | 41 | SLKRVVWALCFMGSLALLALVCTNRIQYYFLYP <h>VTKLDE</h> | 80 |    |     |   |    |   |   |     |
| Consensus aa: |    | oL+RsLWAht <h>SLAhhhh.hhpRlpYY..@.H.TpLDE</h>   |    |    |     |   |    |   |   |     |
| Consensus ss: |    | hhhhhhhhhhhhhhhhhhhhhhhhhhhhhh eeeeeee          |    |    |     |   |    |   |   |     |

|               |    |                                                        |     |   |   |   |     |    |   |   |
|---------------|----|--------------------------------------------------------|-----|---|---|---|-----|----|---|---|
| Conservation: |    | 9999999                                                | 99  | 9 | 9 | 9 | 999 | 99 | 9 | 9 |
| ratASIC1a     | 80 | VAASQLTFPAVTLCNLNEFRFSQVSKNDLYHAGELLALLN               | 119 |   |   |   |     |    |   |   |
| ratASIC3      | 80 | RESHQLTFPAVTLCNINPLRRSLTPNDLHWAGTALLGLD                | 119 |   |   |   |     |    |   |   |
| chickenASIC1a | 81 | VAA <del>TR</del> LTTFPAVTFCNLNEFRFSRVTKNDLYHAGELLALLN | 120 |   |   |   |     |    |   |   |
| Consensus aa: |    | ..tppLTFPAVThCNlN.hR.SpLo.NDL@@AGp <h>Lh.Ls</h>        |     |   |   |   |     |    |   |   |
| Consensus ss: |    | eee eee eee hhhhhhhhhhhhhhhhhhhhhhhhh                  |     |   |   |   |     |    |   |   |

|               |     |                                                                                 |     |   |   |   |
|---------------|-----|---------------------------------------------------------------------------------|-----|---|---|---|
| Conservation: |     | 9                                                                               | 9   | 9 | 9 | 9 |
| ratASIC1a     | 120 | NRYEIPDTQMADEKQLEILQDKANFRSF-KPKPFNMREFY                                        | 158 |   |   |   |
| ratASIC3      | 120 | PAEHAA-----YLRALGQPPAPPGFMPSPFTDMAQLY                                           | 151 |   |   |   |
| chickenASIC1a | 121 | NRYEIPDTQTAD <h>EKQLEILQDKANFRNF-KPKPFNMLEFY</h>                                | 159 |   |   |   |
| Consensus aa: |     | s.bch <b>s</b> .....bLchL.p.ss..s <b>F</b> ..s <b>F</b> s <b>M</b> .p <b>hY</b> |     |   |   |   |
| Consensus ss: |     | hh hhhhhhhhh hhhhh                                                              |     |   |   |   |

|               |     |                                                           |     |   |    |   |   |   |     |   |       |
|---------------|-----|-----------------------------------------------------------|-----|---|----|---|---|---|-----|---|-------|
| Conservation: |     | 9999                                                      | 999 | 9 | 99 | 9 | 9 | 9 | 999 | 9 | 99999 |
| ratASIC1a     | 159 | DRAGHDIRDMLLSCHFRGEACSAEDFKVVFTRYGKCYTFN                  | 198 |   |    |   |   |   |     |   |       |
| ratASIC3      | 152 | ARAGHSLEDMLLDCRYRGQPCGPENFTVIFTRMGQCYTFN                  | 191 |   |    |   |   |   |     |   |       |
| chickenASIC1a | 160 | DRAGHDIREMLLSCFRGEQCSPEDFKVVFTTRYGKCYTFN                  | 199 |   |    |   |   |   |     |   |       |
| Consensus aa: |     | sRAGHsLc-MLLS <b>C</b> .@RGp.Ct <b>sEsFpVlFTRhGpCYTFN</b> |     |   |    |   |   |   |     |   |       |
| Consensus ss: |     | hhh hhhhhheeee eee hhheeeee eeee                          |     |   |    |   |   |   |     |   |       |

|               |     |                                                |     |   |   |     |            |    |      |   |   |
|---------------|-----|------------------------------------------------|-----|---|---|-----|------------|----|------|---|---|
| Conservation: |     | 9                                              | 9   | 9 | 9 | 999 | 9999999999 | 99 | 9999 | 9 | 9 |
| ratASIC1a     | 199 | SGQDGRPRLKTMKGGTGNGLEIMLDIQQDEYLPVWGETDE       | 238 |   |   |     |            |    |      |   |   |
| ratASIC3      | 192 | SGAHGAELLTTPKGGAGNGLEIMLDVQEEYLPWKDMEE         | 231 |   |   |     |            |    |      |   |   |
| chickenASIC1a | 200 | AGQDGKPRLITMKGGTGNGLEIMLDIQQDEYLPVWGETDE       | 239 |   |   |     |            |    |      |   |   |
| Consensus aa: |     | tG.cG...L.T.KGG <h>GNGLEIMLDlQQ-EYLPW.-h-E</h> |     |   |   |     |            |    |      |   |   |
| Consensus ss: |     | eeee eeeeeeee hhh                              |     |   |   |     |            |    |      |   |   |

Conservation: 9 99 99 9999999999 9999999 999 9999999 9  
 ratASIC1a 239 TSFEAGIKVQIHSQDEPPFIDQLGFGVAPGFQTFVSCQEQ 278  
 ratASIC3 232 TPFEVGI**RVQI**HSQDEPPAIDQL**GFGA**APGH**QTFVSCQQQ** 271  
 chickenASIC1a 240 TSFEAG**IKVQI**HSQDEPPLIDQL**GFGV**APGF**QTFVSCQE**Q 279  
Consensus aa: **TsFEhGI+VQIHSQDEPPhIDQLGFGhAPG@QTFVSCQpQ**  
Consensus ss: eeeeee eeee eeeeeeeeh

Conservation: 9 99 999 9 9 9  
 ratASIC1a 279 RLIYLPSPWGTCNAVTMDSDFFD-----S 302  
 ratASIC3 272 **QLS**FLPPPWGDCNTASLDPDDFDPEPSDPLGSPRPRPSPP 311  
 chickenASIC1a 280 **RLI**YLPSPWGDCCKATTGDSEFYD-----T 303  
Consensus aa: p**L.@LPsPWGsCp**hho.Ds-**.@D**.....s  
Consensus ss: heee

Conservation: 99 99 99 99 9 999 9999 9 9 9 999  
 ratASIC1a 303 YSITACRIDCETRYLVENCNCRMVHMPGDAPYCTPEQYKE 342  
 ratASIC3 312 **YSLIGCRLACESRYVARK**CGCRMHMPGNS**PVCS**PQQYKD 351  
 chickenASIC1a 304 YS**ITACRIDCETRYLVEN**CNCRMVHMPGDAPYCT**PEQYKE** 343  
Consensus aa: **YSlhtCRlsCEoRYlh**cp**CsCRMhHMPGstPhCoPpQYK-**  
Consensus ss: hhhhhhhhhhhhhhhhhhh ee hhhhhh

Conservation: 99 9999 99 999 99 999 999999 999  
 ratASIC1a 343 CADPALDFLVEKDQEYCVCEMPCNLTRYGKELSMVKIPSK 382  
 ratASIC3 352 **CASPALDAML**RKD--TCVCPNPCAT**TRYAKELSMVR**IPSR 389  
 chickenASIC1a 344 **CADPALDFLVEKDNE**YCVCEMPCNV**TRYGKELSMVK**IPSK 383  
Consensus aa: **CAsPALDhhlcKD..hCVC..PCshTRYtKELSMV+IPS+**  
Consensus ss: hhhhhhhhhh eeeeeeeeeee h

Conservation: 999 999 9 9 99 99 99 99999999 9999 999  
 ratASIC1a 383 ASAKYLAKKFNKSEQYIGENILVLDIFFEVLNYETIEQKK 422  
 ratASIC3 390 **ASARYLARKY**NRSESYITEN**VLVLDIFFEALN**YEA**VEQKA** 429  
 chickenASIC1a 384 **ASAKYLAKKY**NKSEQYIGEN**ILVLDIFFEALN**YETIEQKK 423  
Consensus aa: **ASA+YLA+K@N+SEpYIsENllVLDIFFEhLNYEhLEQK.**  
Consensus ss: hhhhhhhhhh eeeeeeee eeeeeeee

Conservation: 999 9999999999999999 99 99 99 99 9  
 ratASIC1a 423 AYEIAGLLGDIGGQMGLFIGASILTVLELFDYAYEVIKHR 462  
 ratASIC3 430 AYE**VSELLGDIGGQMGLFIGASLLTILEILDY**LCEVFQDR 469  
 chickenASIC1a 424 AYE**VAGLLGDIGGQMGLFIGASILTVLELFDYAYEVIKHR** 463  
Consensus aa: **AYElT.lLGDIGGQMGLFIGASlLTllLElhdYhhEVh**p**cR**  
Consensus ss: hhhhhhhhhhhhhhhhhhhhhhhhhhhhhhhhhhhhhhhhhhhhhhh

Conservation:

9999

ratASIC1a463LCRRGKCQKEAKRSSADKGVALSLDDVKRHNPCESLRGHP502

ratASIC3470VLGYFWNRRSAQKRSGNTLLQEELNGHRTHVPHLSLGPRP509

chickenASIC1a464LCRRGKCRKNHKNRNTDKGVALSMDDVKRHNPCESLRGHP503

Consensus aa:lh...bsp+ph+psssp.l.bphssh+pHsPhbSL.s+P

Consensus ss:hhhhhhhhh hh

Conservation:

99

ratASIC1a503AGMT--YAANILPHHPARGTFEDFTC-----526

ratASIC3510PTTPCAVTKTLSASHRT-----CYLVTRL533

chickenASIC1a504AGMT--YAANILPHHPARGTFEDFTC-----527

Consensus aa:sshs..hh.sl.spH.h.....C.....

Consensus ss:eeee

**Supplementary Table 1. pH<sub>50</sub> and Hill coefficient of ASIC1a WT and histidine mutants in the extracellular domain of ASIC1a during activation.**

|              | pH <sub>50</sub> | Hill coefficient | Sample size | Statistics |
|--------------|------------------|------------------|-------------|------------|
| ASIC1a WT    | 6.3 ± 0.05       | 2.7 ± 0.2        | 7           |            |
| ASIC1a-H72A  | 6.2 ± 0.05       | 2.8 ± 0.2        | 5           | $p > 0.05$ |
| ASIC1a-H73A  | 6.2 ± 0.06       | 2.6 ± 0.1        | 5           | $p > 0.05$ |
| ASIC1a-H110A | 6.2 ± 0.09       | 2.8 ± 0.2        | 5           | $p > 0.05$ |
| ASIC1a-H163A | 6.2 ± 0.05       | 2.7 ± 0.1        | 5           | $p > 0.05$ |
| ASIC1a-H173A | 6.3 ± 0.04       | 2.7 ± 0.1        | 5           | $p > 0.05$ |
| ASIC1a-H250A | 6.3 ± 0.06       | 2.6 ± 0.1        | 5           | $p > 0.05$ |
| ASIC1a-H327A | 6.2 ± 0.07       | 2.8 ± 0.2        | 5           | $p > 0.05$ |

pH<sub>50</sub> and Hill value of each mutant were compared with ASIC1a WT. Data were presented as mean ± SEM.

**Supplementary Table 2. pH<sub>50</sub> and Hill coefficient of ASIC3 WT and histidine mutants in the extracellular domain of ASIC3 during activation of the channel**

|             | pH <sub>50</sub> | Hill coefficient | Sample size | Statistics |
|-------------|------------------|------------------|-------------|------------|
| ASIC3 WT    | 6.8 ± 0.03       | 1.4 ± 0.1        | 6           |            |
| ASIC3-H72A  | 6.8 ± 0.02       | 1.3 ± 0.1        | 5           | $p > 0.05$ |
| ASIC3-H73A  | 6.8 ± 0.03       | 1.4 ± 0.1        | 5           | $p > 0.05$ |
| ASIC3-H83A  | 6.8 ± 0.03       | 1.3 ± 0.1        | 5           | $p > 0.05$ |
| ASIC3-H109A | 6.9 ± 0.02       | 1.3 ± 0.1        | 5           | $p > 0.05$ |
| ASIC3-H123A | 6.8 ± 0.03       | 1.4 ± 0.1        | 5           | $p > 0.05$ |
| ASIC3-H156A | 6.8 ± 0.02       | 1.4 ± 0.1        | 5           | $p > 0.05$ |
| ASIC3-H195A | 6.8 ± 0.03       | 1.4 ± 0.1        | 5           | $p > 0.05$ |
| ASIC3-H243A | 6.9 ± 0.02       | 1.3 ± 0.1        | 5           | $p > 0.05$ |
| ASIC3-H262A | 6.8 ± 0.03       | 1.4 ± 0.1        | 5           | $p > 0.05$ |
| ASIC3-H336A | 6.8 ± 0.03       | 1.3 ± 0.1        | 5           | $p > 0.05$ |

pH<sub>50</sub> and Hill value of each mutant compared with ASIC1a WT. Data were presented as mean ± SEM.
